# Supplementary material for: Chitosan Membranes Containing Plant Extracts: Preparation, Characterization and Antimicrobial Properties
Source: MDPI journal article supplement (doi:10.3390/ijms24108673), 2023-05-12
Supplement: s1 [file s1]

## Supplementary Information

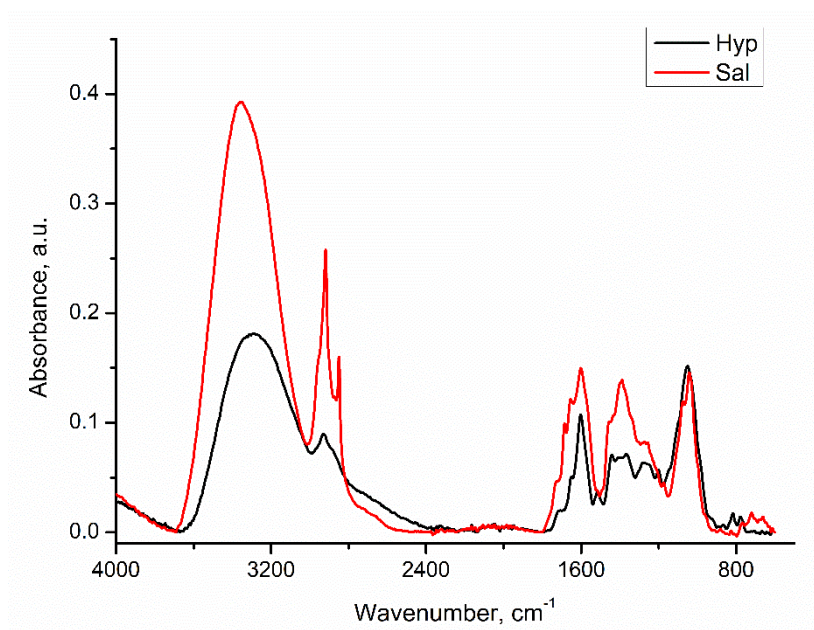

**Figure S1.** IR spectra of pure *H. perforatum* (Hyp) and *S. Officinalis* (Sal) extracts
